# Supplementary material
Source: MDPI journal article supplement (https://www.mdpi.com/2073-4344/11/6/684)
Supplement: s1 [file s1]

**Synthesis and characterization of nickel (II) homogenous and supported complexes for  
the hydrogenation of furfural to furfuryl alcohol**

Menala Kalumpha<sup>1\*</sup>, Leah. C. Matsinha<sup>1</sup>, Banothile. C. E. Makhubela<sup>1</sup>

<sup>1</sup>Research Center for Synthesis and Catalysis, Department of Chemical Sciences, University  
of Johannesburg, Auckland Park 2006, Johannesburg-South Africa.

**Supplementary Information**

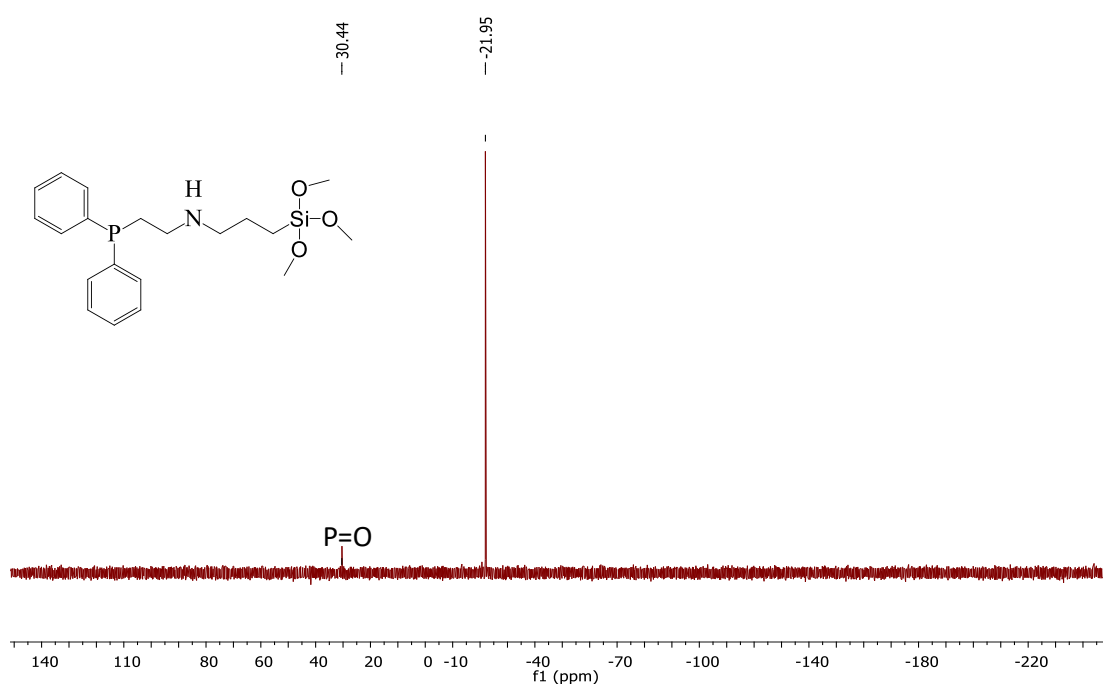

**Figure S1** <sup>31</sup>P{<sup>1</sup>H} NMR spectrum for ligand **L1** in CDCl<sub>3</sub> (500 MHz).

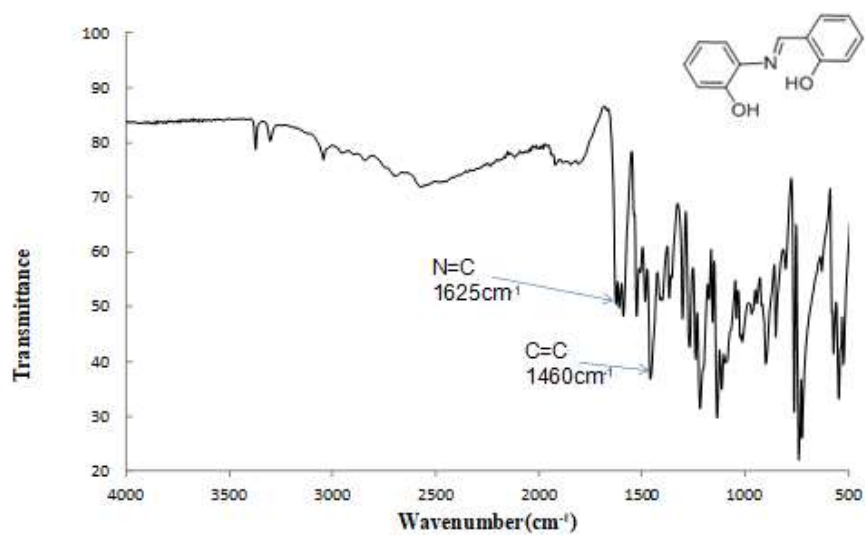

**Figure S2** Infrared spectrum of ligand **L2**.

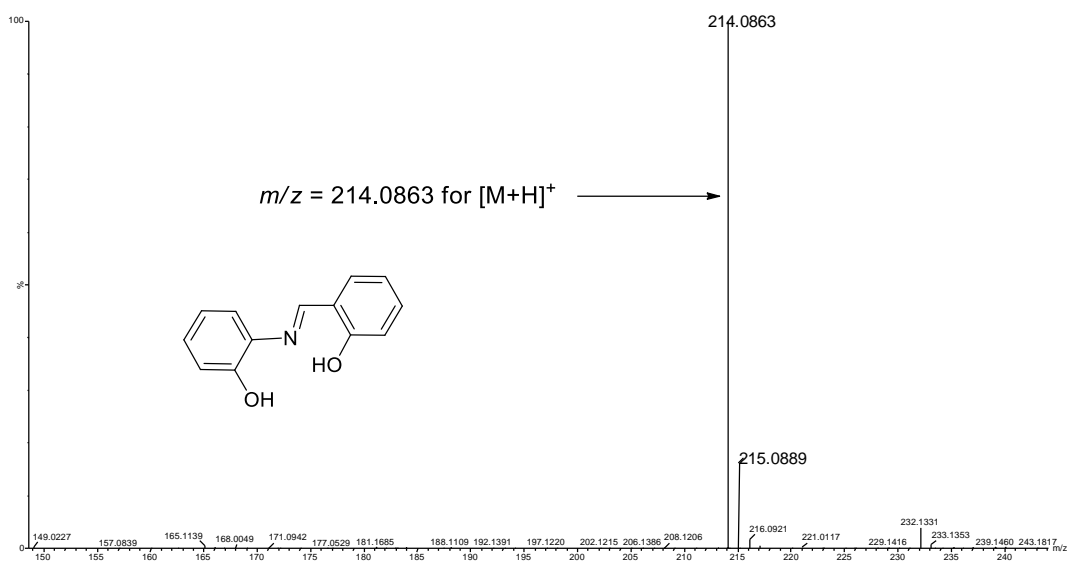

**Figure SI 2b.** Mass spectrum of **L2**.

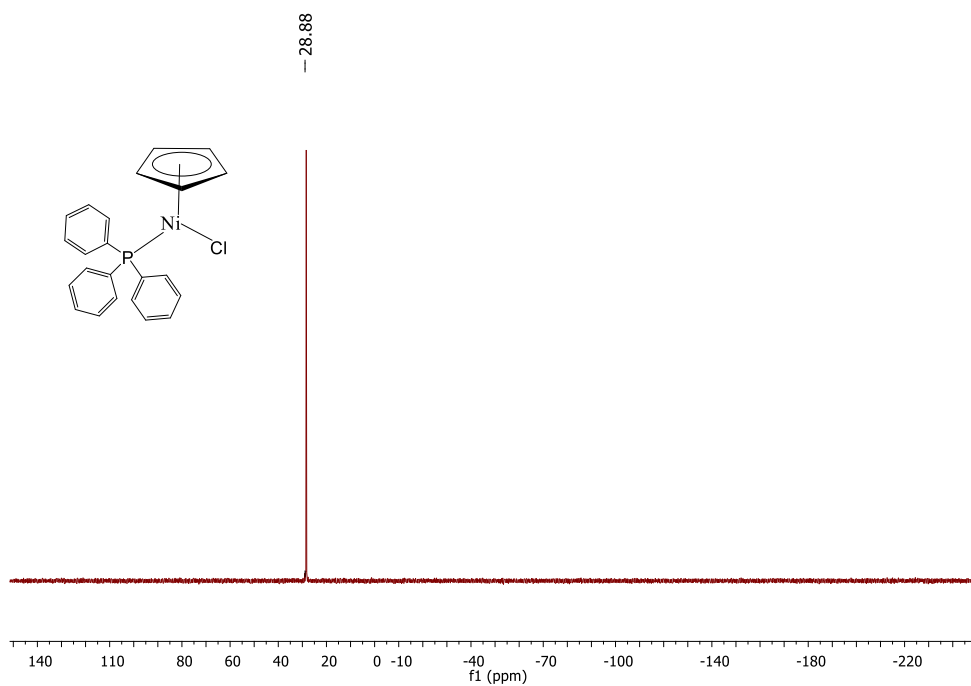

**Figure S3**  $^{31}\text{P}\{^1\text{H}\}$  NMR of complex **C1** in  $\text{CDCl}_3$  (500 MHz).

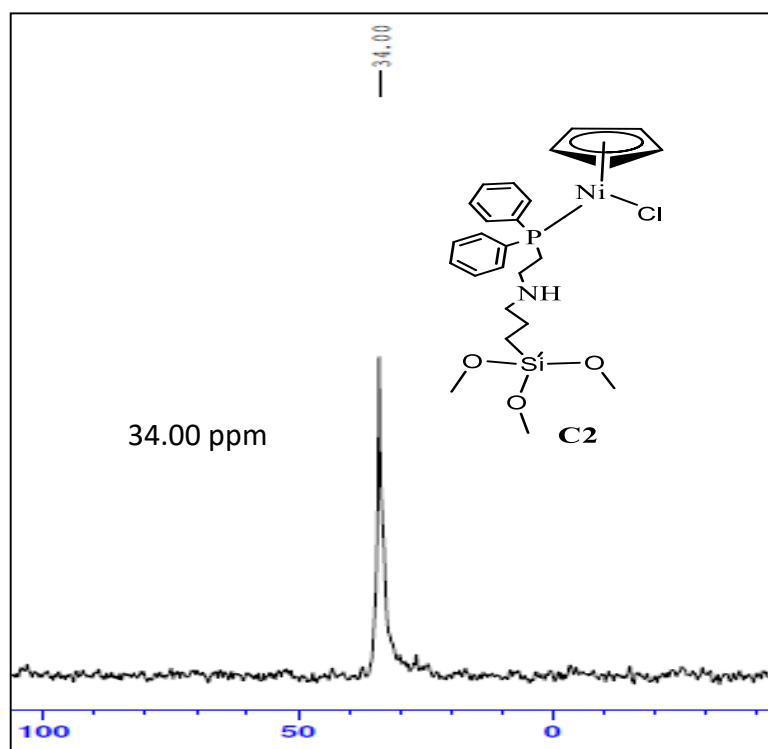

**Figure S4**  $^{31}\text{P}\{^1\text{H}\}$  NMR spectrum of complex **C2** in  $\text{CDCl}_3$  (500 MHz).

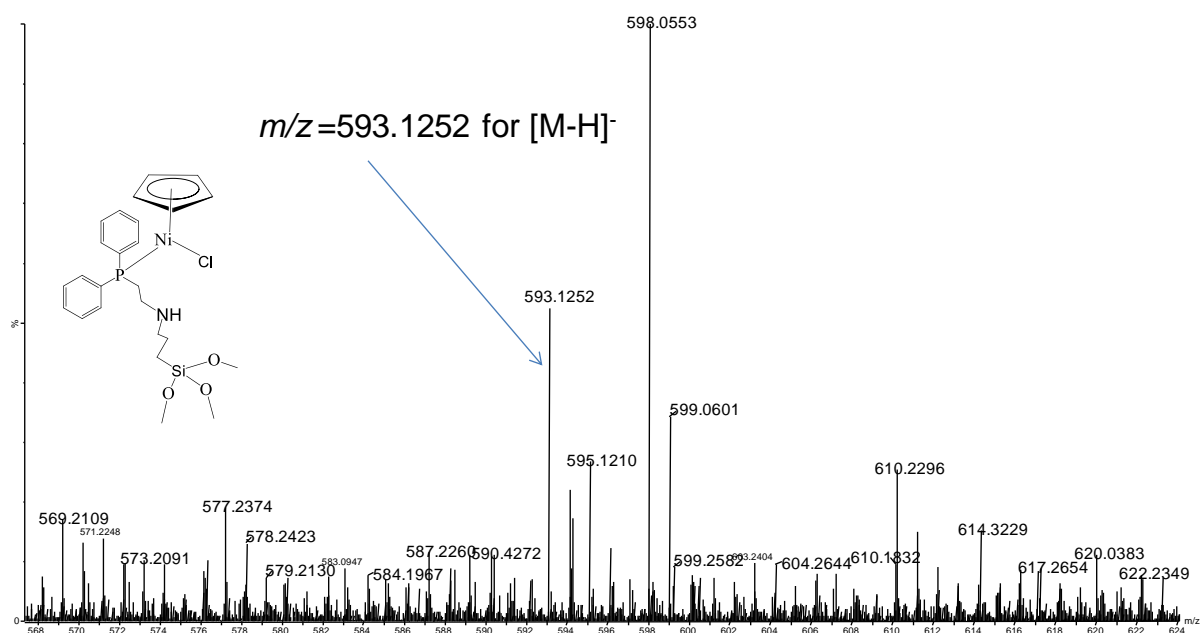

**Figure S5** Mass spectrum of complex **C2**.

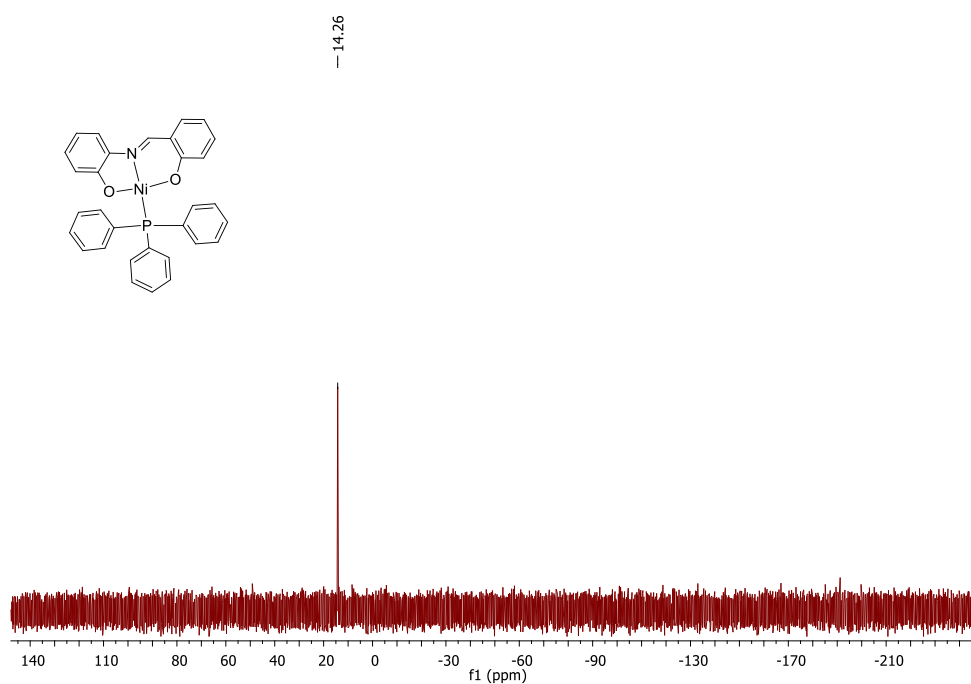

**Figure S6**  $^{31}\text{P}\{^1\text{H}\}$  NMR for complex **C4** in  $\text{CDCl}_3$  (500 MHz)

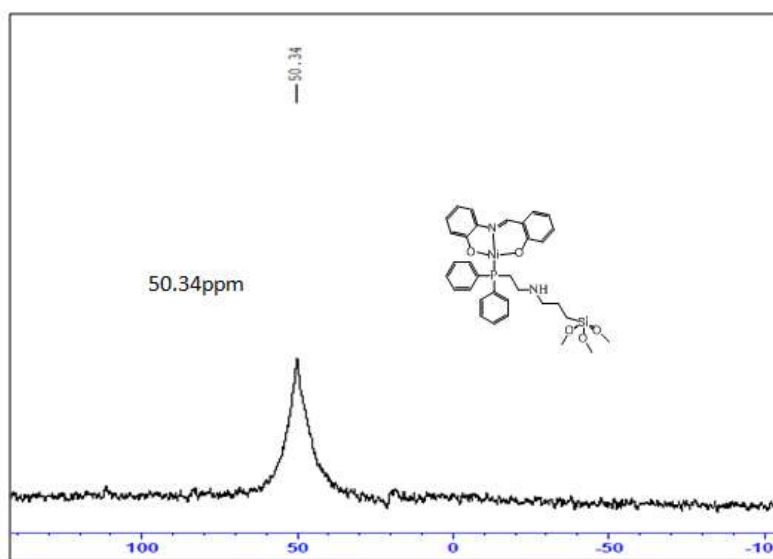

**Figure S7**  $^{31}\text{P}\{^1\text{H}\}$  NMR spectrum of complex C5

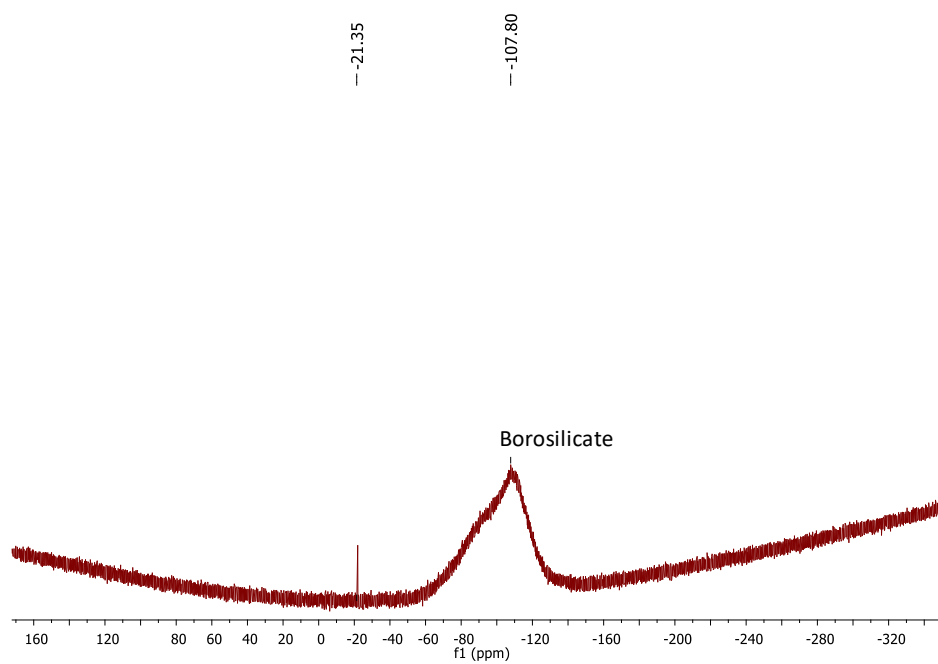

**Figure S8**  $^{29}\text{Si}$  NMR spectrum of complex C5

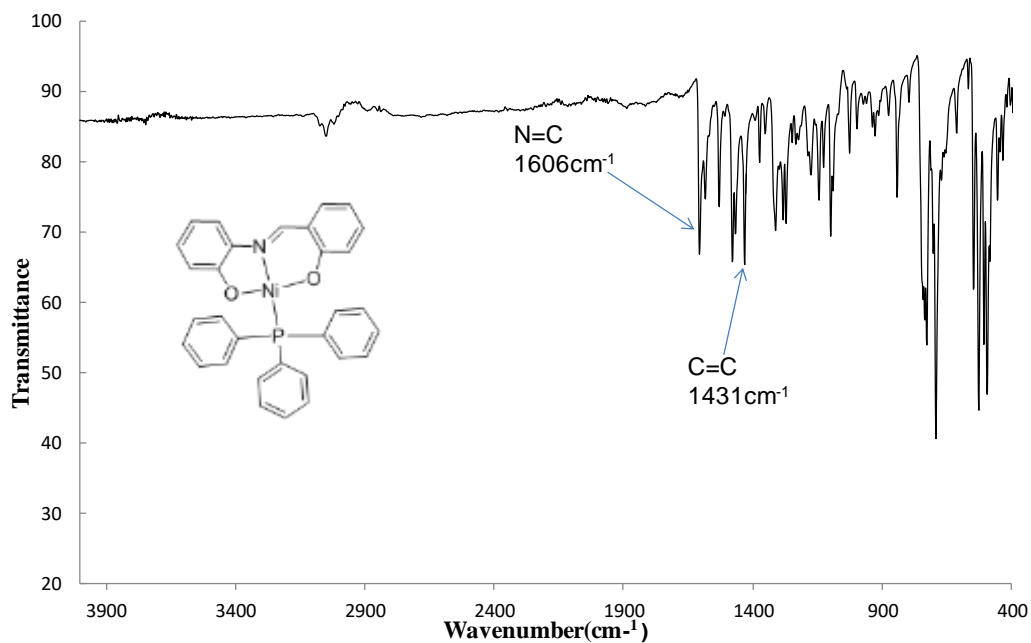

**Figure S9** IR spectrum of complex **C4**

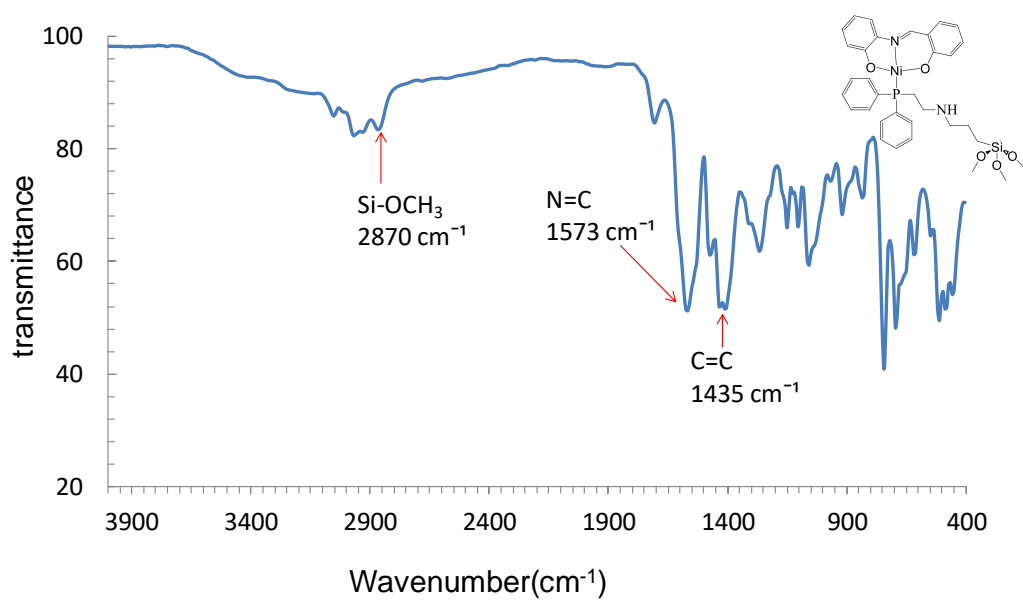

**Figure S10** Infrared spectrum of complex **C5**.

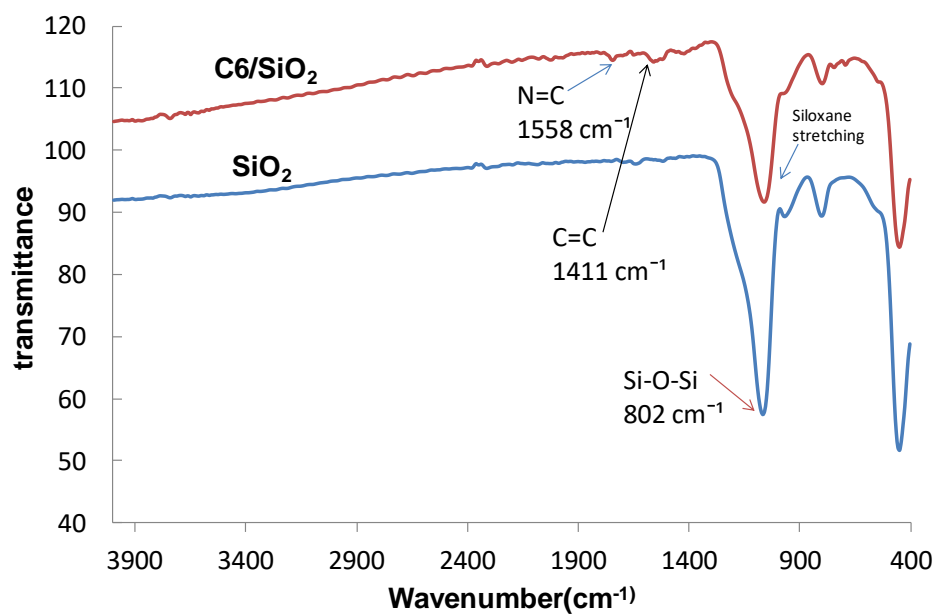

**Figure S11** FT-IR spectra of silica gel (bottom), supported schiff base complex **C6** (top).

**Table S1.** The surface properties of silica gel and Ni (II) anchored catalysts **C3** and **C6**

| Entry | Catalyst            | $S_{\text{BET}}$ (m <sup>2</sup> /g) | $V_{\text{p}}$ (cm <sup>3</sup> /g) | $D_{\text{p}}$ (nm) |
|-------|---------------------|--------------------------------------|-------------------------------------|---------------------|
| 1     | SiO <sub>2</sub>    | 442                                  | 0.69                                | 5.13                |
| 2     | C3/SiO <sub>2</sub> | 258                                  | 0.39                                | 4.63                |
| 3     | C6/SiO <sub>2</sub> | 185                                  | 0.27                                | 4.21                |

$S_{\text{BET}}$  (BET specific surface area),  $V_{\text{p}}$  (pore volume),  $D_{\text{p}}$  (pore diameter)

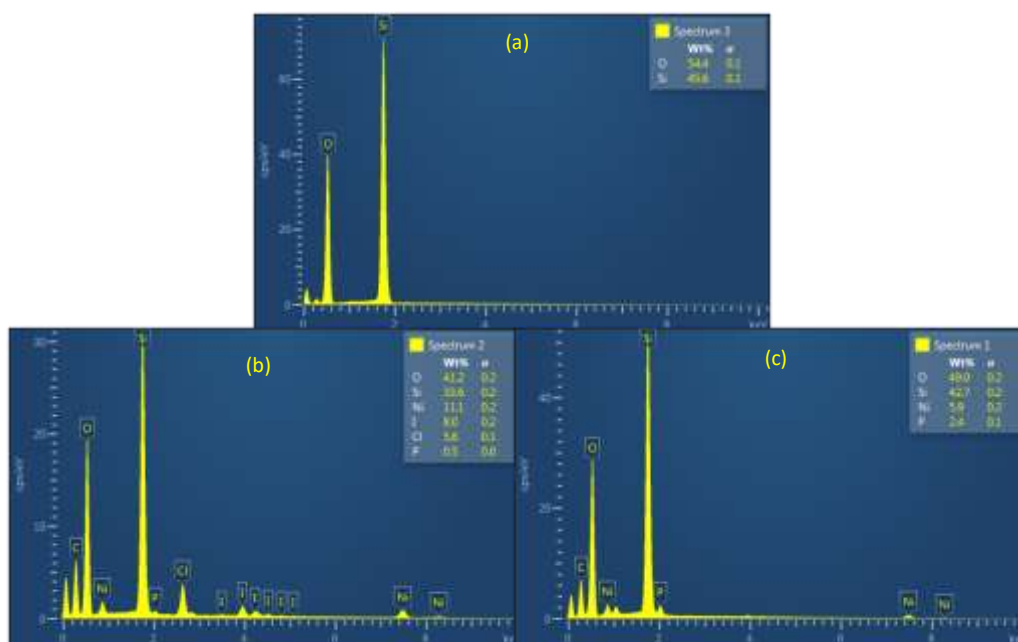

**Figure S12.** EDX images of silica gel (a), Ni (II) supported half-sandwich complex **C3** (b) and schiff base complex **C6** (c).

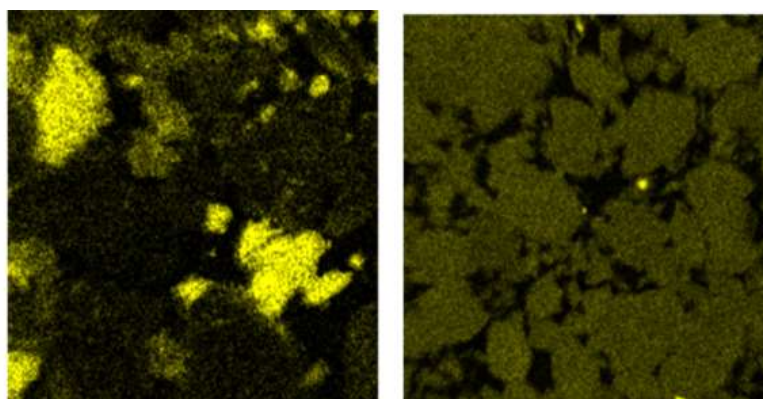

**Figure S13** EDX images showing Ni mapping on the supported half-sandwich complex **C3** (a) and Schiff base complex **C6** (b).



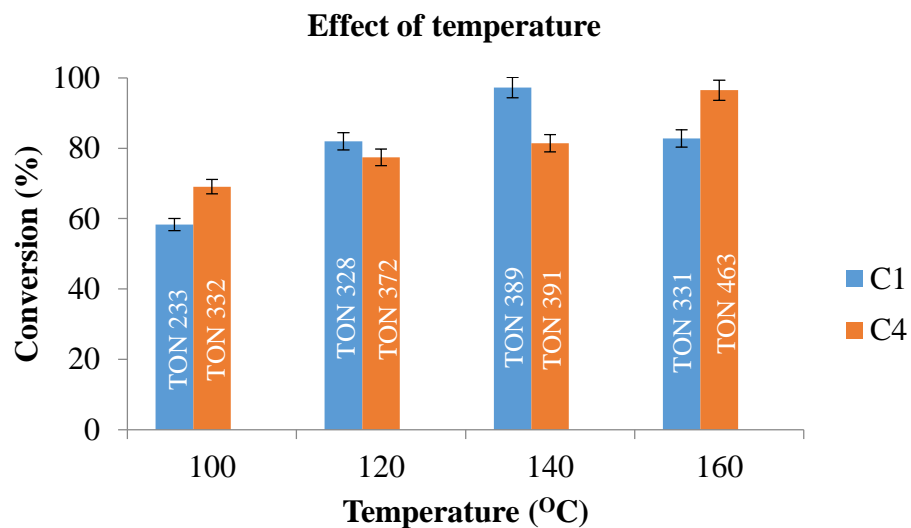

**Figure S14.** Effect of temperature in the hydrogenation of FF

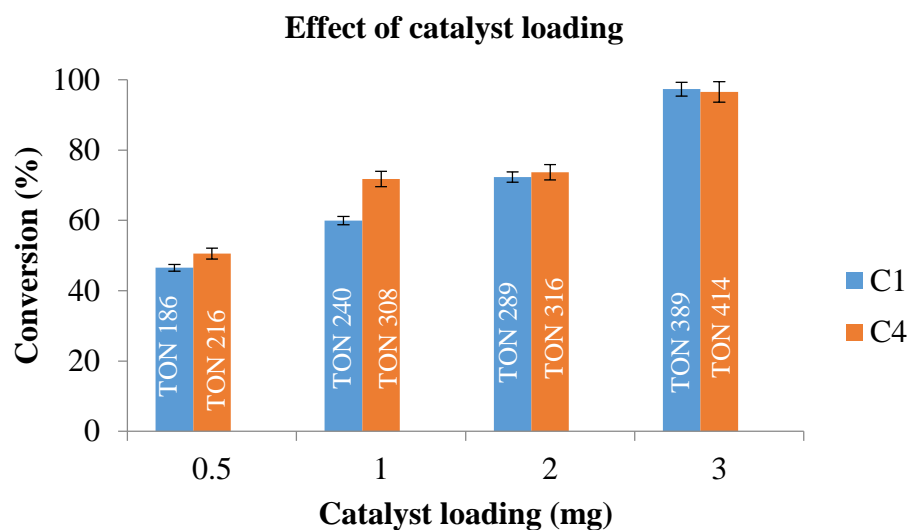

**Figure S15.** Effect of catalyst loading in the hydrogenation of FF

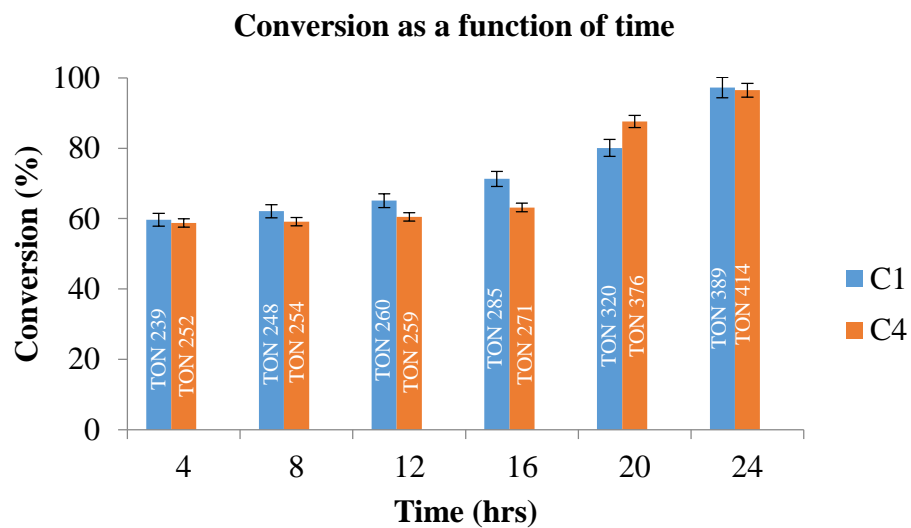

**Figure S16.** Effect of time in the hydrogenation of FF

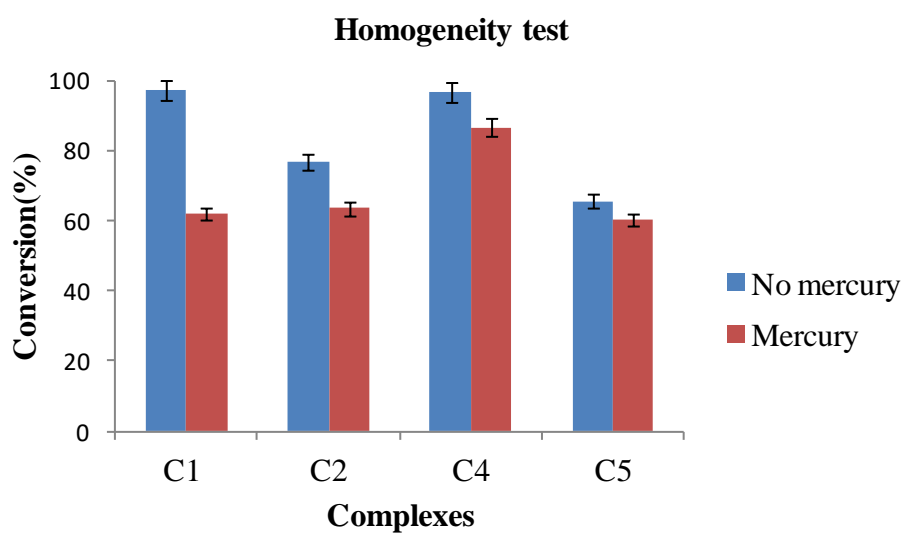

**Figure S17.** Homogeneity test during the hydrogenation of FF to FA using pre-catalysts (C1, C2, C4, C5)

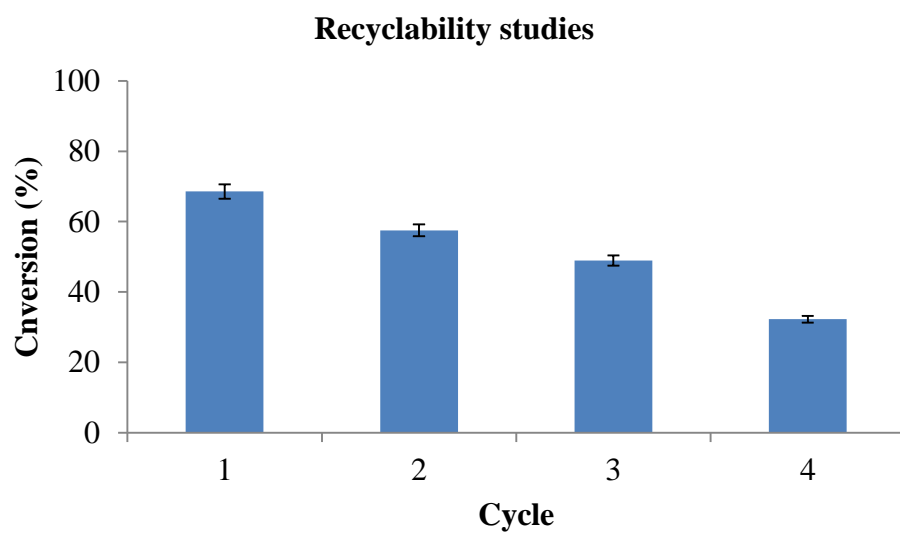

**Figure S18.** Recyclability of pre-catalyst **Si-1**.

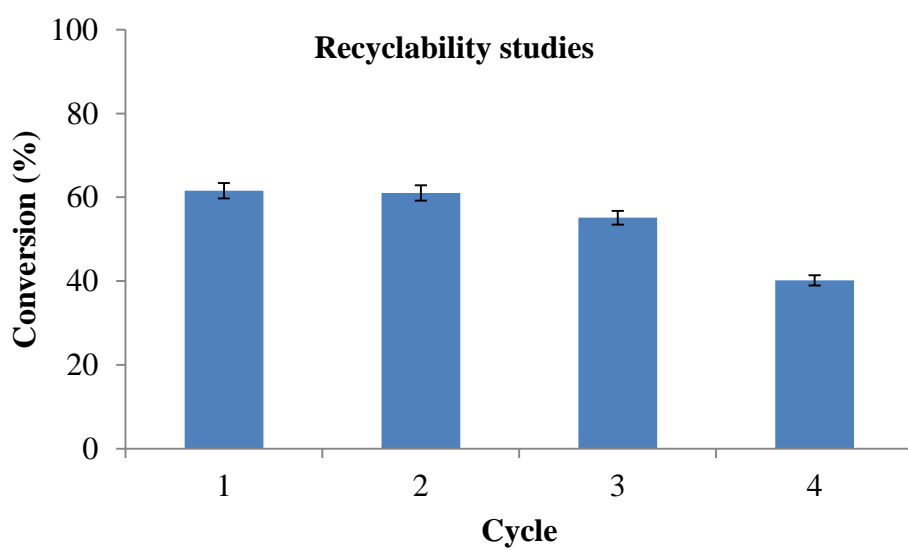

**Figure S19.** Recyclability of pre-catalyst **Si-2**.

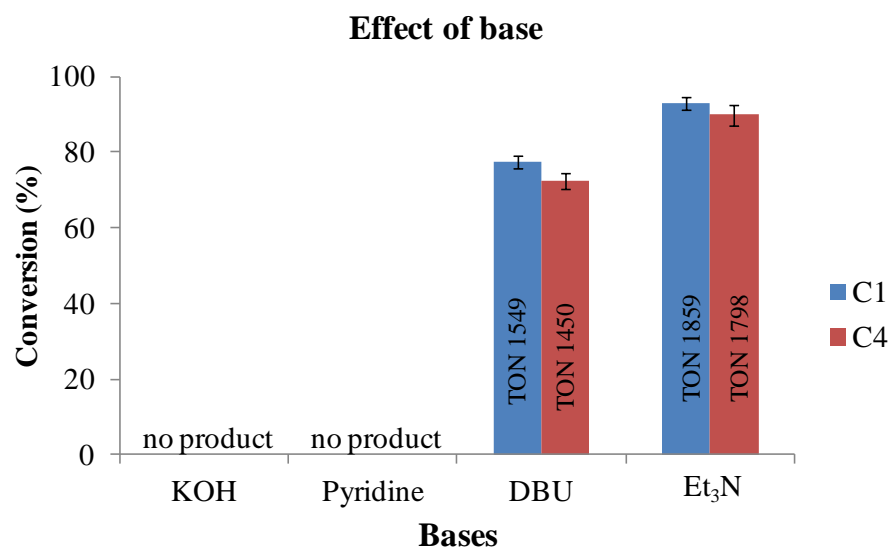

**Figure S20.** Effect of base in the catalytic transfer hydrogenation of FF

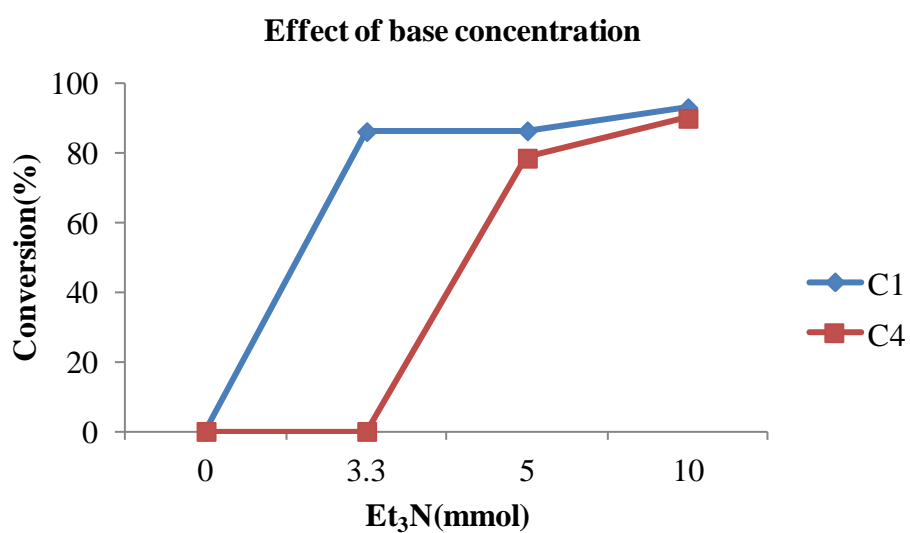

**Figure S21.** Effect of base concentration in the catalytic transfer hydrogenation of FF.

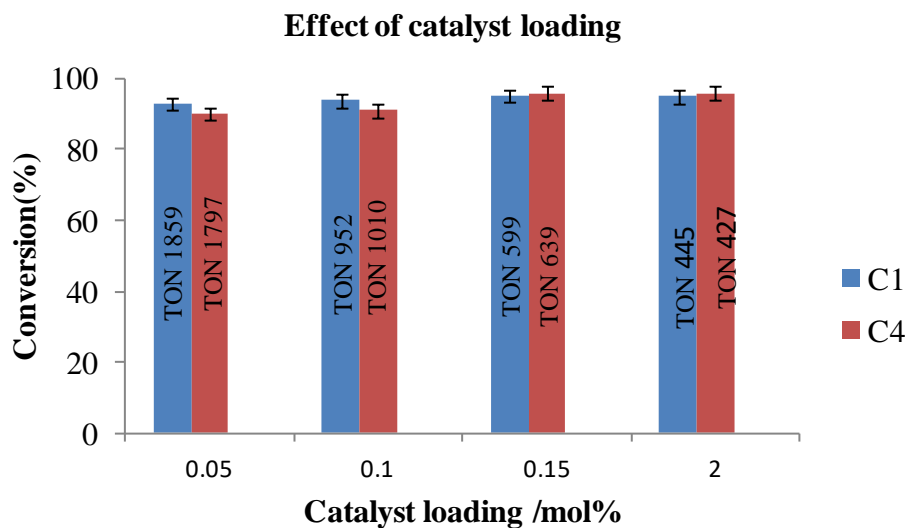

**Figure S22.** Effect of catalyst loading in the catalytic transfer hydrogenation of FF.

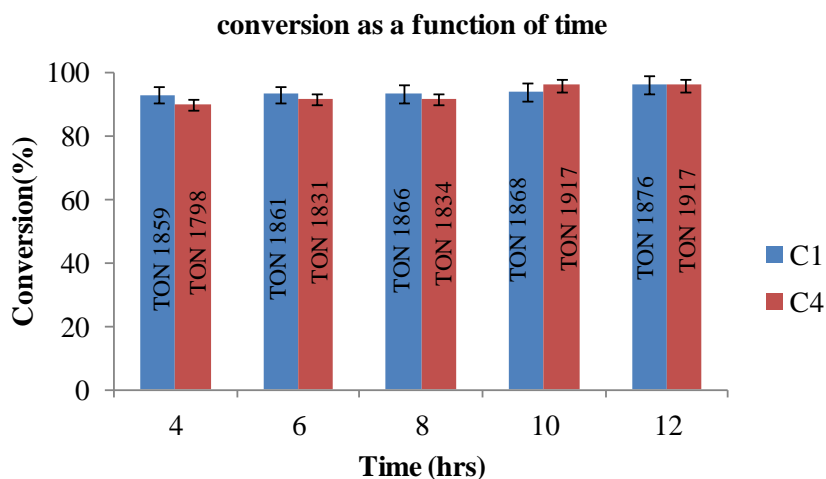

**Figure S23.** Conversion as a function of time in the catalytic transfer hydrogenation of FF

**Table S2** Results of TON and TOF versus time obtained from catalytic transfer hydrogenation of FF

| Entry | Complex | Time/h | TON  | TOF/h <sup>-1</sup> |
|-------|---------|--------|------|---------------------|
| 1     | C1      | 4      | 1859 | 465                 |
| 2     | C4      | 4      | 1798 | 450                 |
| 3     | C1      | 6      | 1861 | 310                 |
| 4     | C4      | 6      | 1831 | 305                 |

|    |           |    |      |     |
|----|-----------|----|------|-----|
| 5  | <b>C1</b> | 8  | 1866 | 233 |
| 6  | <b>C4</b> | 8  | 1834 | 229 |
| 7  | <b>C1</b> | 10 | 1868 | 187 |
| 8  | <b>C4</b> | 10 | 1917 | 192 |
| 9  | <b>C1</b> | 12 | 1876 | 156 |
| 10 | <b>C4</b> | 12 | 1917 | 159 |

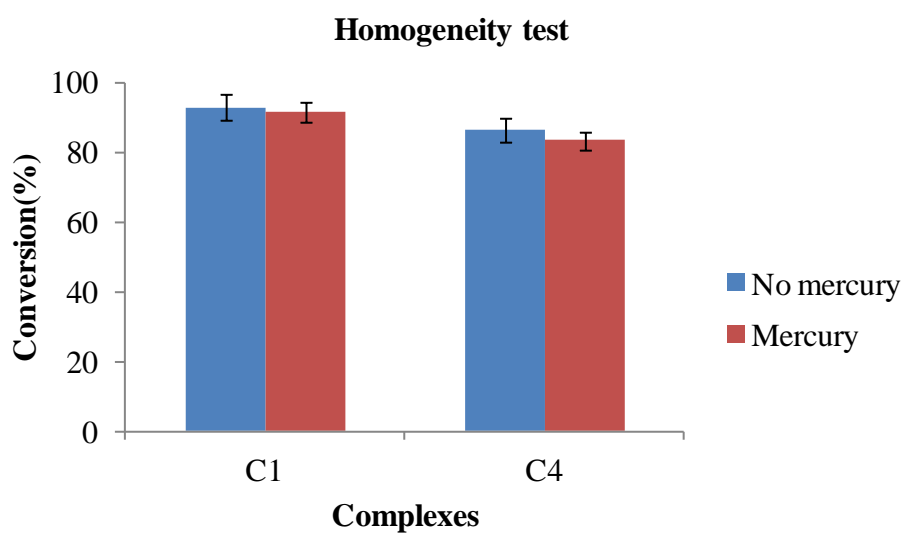

**Figure S24.** Homogeneity test in the catalytic transfer hydrogenation of FF using pre-catalysts **C1** and **C4**.

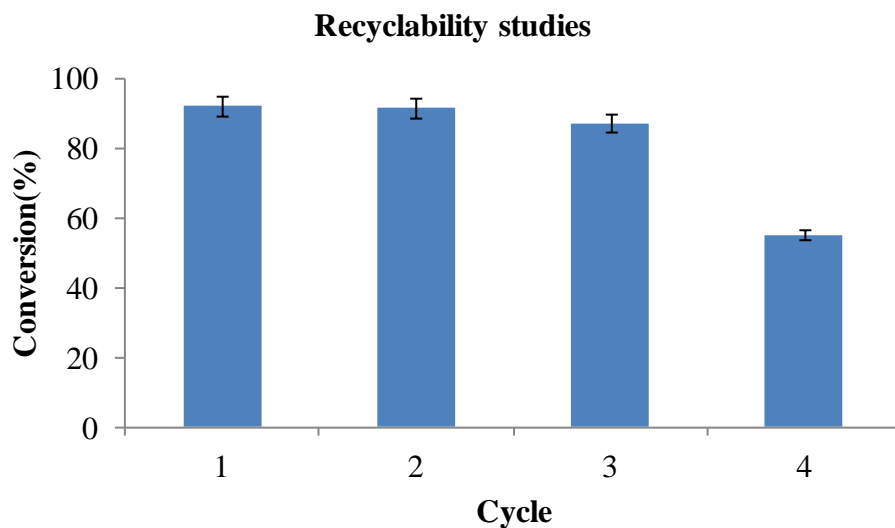

**Figure S25.** Recyclability of precatalyst **C1**

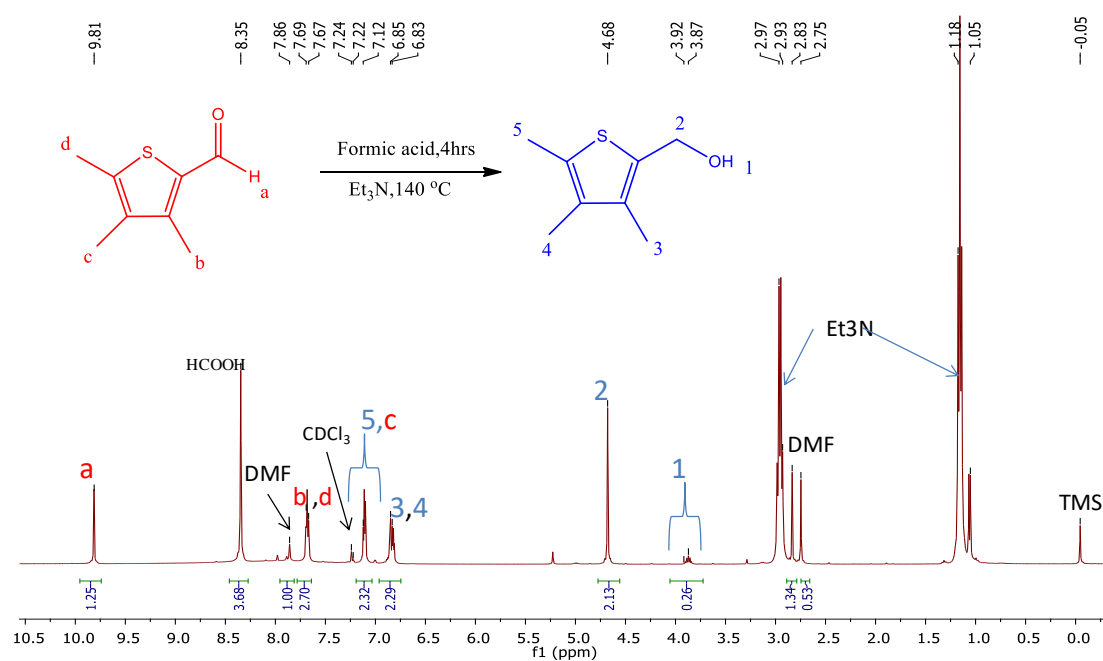

**Figure S26.** <sup>1</sup>H NMR spectrum of the transfer hydrogenation of 2-thiophenecarboxaldehyde to 2-thiophenemethanol using pre-catalyst **C1** in CDCl<sub>3</sub>, DMF internal standard (500 MHz).
